# Supplementary material for: Catalytic Conversion of n-C7 Asphaltenes and Resins II into Hydrogen Using CeO2-Based Nanocatalysts
Source: MDPI journal article supplement (doi:10.3390/nano11051301), 2021-05-14
Supplement: s1 [file s1]

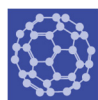

# Catalytic Conversion of *n*-C<sub>7</sub> asphaltenes and resins II into Hydrogen Using CeO<sub>2</sub>-based Nanocatalysts

Oscar E. Medina <sup>1</sup>, Jaime Gallego <sup>2</sup>, Sócrates Acevedo <sup>3</sup>, Masoud Riazi <sup>4</sup>, Raúl Ocampo-Pérez <sup>5</sup>, Farid B. Cortés <sup>1,\*</sup>, and Camilo A. Franco <sup>1,\*</sup>

<sup>1</sup> Grupo de Investigación en Fenómenos de Superficie—Michael Polanyi, Departamento de Procesos y Energía, Facultad de Minas, Universidad Nacional de Colombia, Sede Medellín, 050034 Medellín, Colombia; oemedinae@unal.edu.co (O.E.M.)

<sup>2</sup> Química de Recursos Energéticos y Medio Ambiente, Instituto de Química, Universidad de Antioquia UdeA, Calle 70 No. 52-21, 050010 Medellín, Colombia; andres.gallego@udea.edu.co (J.G.)

<sup>3</sup> Facultad de Ciencias, Escuela de Química, Universidad Central de Venezuela, Caracas 1040, Venezuela; socrates.acevedo@gmail.co (S.A.)

<sup>4</sup> Enhanced Oil Recovery Research Center, IOR-EOR Research Institute, Shiraz University, Shiraz 7193616511, Iran; mriazi@shirazu.ac.ir (M.R.)

<sup>5</sup> Centro de Investigación y Estudios de Posgrado, Facultad de Ciencias Químicas, Universidad Autónoma de San Luis Potosí, Av. Dr. Manuel Nava 6, Zona Universitaria, 78210, San Luis Potosí, México; raul.ocampo@uaslp.mx (R.O.P)

\* Correspondence: caafrancoar@unal.edu.co (C.A.F.); fbcortes@unal.edu.co (F.B.C)

## S.1- Solid-Liquid Equilibrium model

Solid-Liquid Equilibrium model bases on adsorption and association theory of molecules in microporous surfaces, described by the following equations.

$$C = \frac{\psi H}{1 + K\psi} e^{\left(\frac{\psi}{q_m A}\right)} \quad (\text{S1})$$

$$\psi = \frac{-1 + \sqrt{1 + 4K\xi}}{2K} \quad (\text{S2})$$

$$\xi = \frac{q_m q}{(q_m - q)} A \quad (\text{S3})$$

where  $C$  (mmol·mol<sup>-1</sup>) represents the asphaltenes and/or resins concentration,  $A$  (m<sup>2</sup>·g<sup>-1</sup>) is the surface area of nanoparticles,  $H$  (mmol·mol<sup>-1</sup>) refers to the affinity between nanoparticles and resins and/or asphaltenes. Similarly,  $K$  (mmol·mol<sup>-1</sup>) indicates the self-association degree of *n*-C<sub>7</sub> asphaltenes and/or resins II molecules on the surface of the nanoparticles, and  $q_m$  (mol·mol<sup>-1</sup>) is the maximum adsorption capacity [1].

## S.2- Activation energy estimation

Instantaneous reactivity is represented by Equation S4.

$$\frac{d\alpha}{dt} = K_a \exp\left(-\frac{E_a}{RT}\right) f(\alpha) \quad (\text{S4})$$

where,  $K_a$  is the Arrhenius pre-exponential factor,  $R$  is the ideal gas constant and  $E_a$  the effective activation energy. In addition,  $d\alpha/dt$  refers to the change in conversion ( $\alpha$ ) of asphaltenes and/or resins II concerning time. Integration of Equation (S4) bearing in mind isothermal conditions, lead Equation S5:

$$g(\alpha) = K_a \exp\left(-\frac{E_a}{RT}\right) t \quad (\text{S7})$$

Applying natural logarithm on both sides of Equation S5, the expression can be written in linear terms as Equation S6

$$\ln(t_{a,i}) = \ln\left(\frac{g(\alpha)}{K_a}\right) + \frac{E_a}{RT_i} \quad (\text{S6})$$

By graphing  $\ln(t_{a,i})$  against  $1/T_i$ , effective activation energy values can be obtained by the slope.

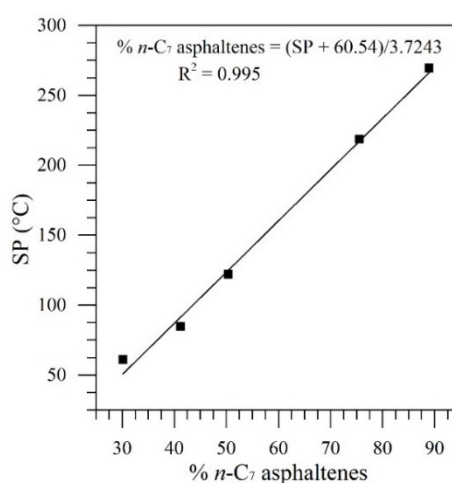

**Figure S1.** Softening point calibration curve.

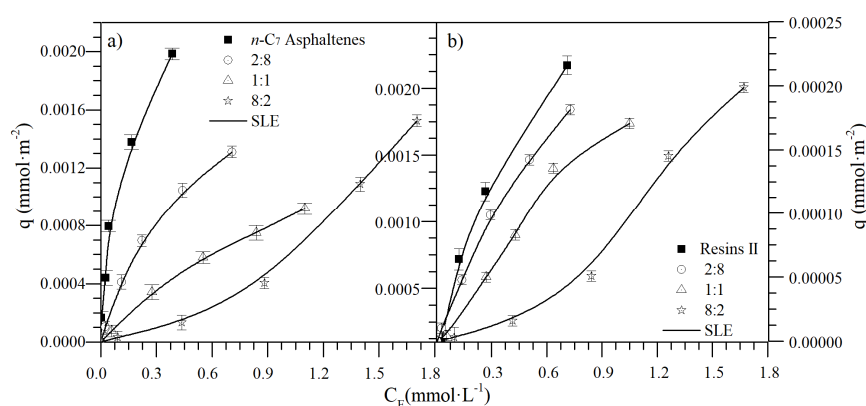

**Figure S2.** Adsorption isotherms constructed for (a) *n*-C<sub>7</sub> asphaltenes and (b) resins II on CeNi1Pd1 nanoparticles for different R:A ratios. The dotted lines are from the SLE model and the symbols are experimental data.

**Table S1.** Estimated SLE model parameters for adsorption isotherms of *n*-C<sub>7</sub> asphaltenes and/or resins II on different nanocatalysts and different Resins-Asphaltene (R:A ratios). *H* represents the Henry's law constant, *K* gives an idea about the self-association degree of asphaltenes over nanoparticle surface, and *q<sub>m</sub>* is the maximum amount adsorbed.

| Sample           | R:A        | <i>n</i> -C <sub>7</sub> asphaltenes                     |                                                          |                                                                      |          | Resins II                                                |                                                          |                                                                      |          |
|------------------|------------|----------------------------------------------------------|----------------------------------------------------------|----------------------------------------------------------------------|----------|----------------------------------------------------------|----------------------------------------------------------|----------------------------------------------------------------------|----------|
|                  |            | <i>H</i><br>(mmol·g <sup>-1</sup> )<br>x10 <sup>-3</sup> | <i>K</i><br>(mmol·g <sup>-1</sup> )<br>x10 <sup>-3</sup> | <i>q<sub>m</sub></i><br>(mmol·m <sup>-2</sup> )<br>x10 <sup>-3</sup> | %<br>RSM | <i>H</i><br>(mmol·g <sup>-1</sup> )<br>x10 <sup>-2</sup> | <i>K</i><br>(mmol·g <sup>-1</sup> )<br>x10 <sup>-2</sup> | <i>q<sub>m</sub></i><br>(mmol·m <sup>-2</sup> )<br>x10 <sup>-2</sup> | %<br>RSM |
| CeNi1Pd1         | Individual | 6.97                                                     | 4.36                                                     | 0.21                                                                 | 0.01     | 7.60                                                     | 0.61                                                     | 0.19                                                                 | 0.01     |
| CeFe1Pd1         | Individual | 7.25                                                     | 4.39                                                     | 0.19                                                                 | 0.01     | 8.05                                                     | 0.21                                                     | 0.18                                                                 | 0.05     |
| CeCo1Pd1         | Individual | 6.99                                                     | 6.36                                                     | 0.21                                                                 | 0.01     | 9.17                                                     | 1.66                                                     | 22.51                                                                | 0.02     |
| CeO <sub>2</sub> | Individual | 11.15                                                    | 22.81                                                    | 0.13                                                                 | 0.01     | 11.50                                                    | 7.96                                                     | 19.40                                                                | 0.01     |
| CeNi1Pd1         | 2:8        | 8.38                                                     | 5.75                                                     | 0.20                                                                 | 0.01     | 171.68                                                   | 9.06                                                     | 23.47                                                                | 0.02     |
|                  | 1:1        | 13.90                                                    | 6.24                                                     | 0.15                                                                 | 0.01     | 0.18                                                     | 8.53                                                     | 31.57                                                                | 0.01     |
|                  | 8:2        | 117.05                                                   | 6.91                                                     | 28.18                                                                | 0.01     | 4.42                                                     | 3.35                                                     | 0.25                                                                 | 0.02     |

**Table S2.** Estimated slope and intercept of the linear plots of *q<sub>predicted</sub>* as a function of *q<sub>experimental</sub>* for the adsorption and desorption of *n*-C<sub>7</sub> asphaltenes in absence and presence of resins II in the systems at different R:A ratios.

| R:A Ratio                            | <i>m</i> | <i>b</i> (x10 <sup>-3</sup> ) | <i>R</i> <sup>2</sup> |
|--------------------------------------|----------|-------------------------------|-----------------------|
| <i>n</i> -C <sub>7</sub> Asphaltenes | 1.0      | 0.0                           | 1.0                   |
| 2:8                                  | 1.03     | -1.11                         | 0.99                  |
| 1:1                                  | 1.05     | -2.80                         | 0.98                  |
| 8:2                                  | 1.04     | -3.21                         | 0.99                  |

## References

1. Montoya, T.; Coral, D.; Franco, C.A.; Nassar, N.N.; Cortés, F.B. A novel solid–liquid equilibrium model for describing the adsorption of associating asphaltene molecules onto solid surfaces based on the “chemical theory”. *Energy & Fuels* **2014**, *28*, 4963–4975.
